# Supplementary figures and images for: Risk Awareness as a Key Determinant of Early Vaccine Uptake in the Mpox Vaccination Campaign in an Italian Region: A Cross-Sectional Analysis
Source: Preprints.org preprint supplement (doi:10.20944/preprints202310.1395.v1), 2023-10-24

**(G) SF-36 PCS**

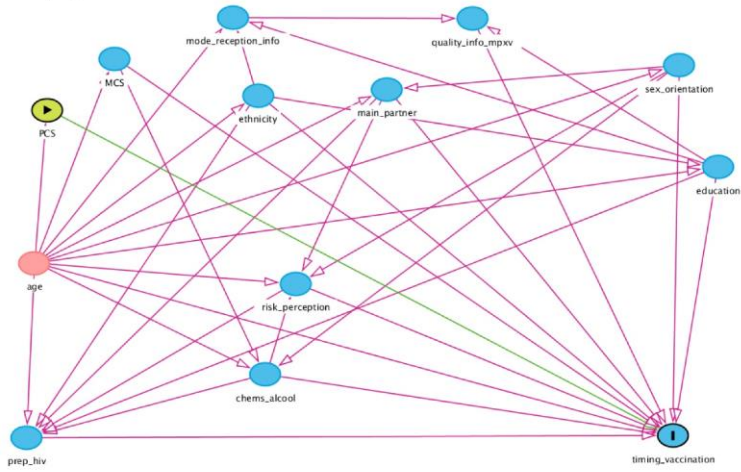

**(H) SF-36 MCS**

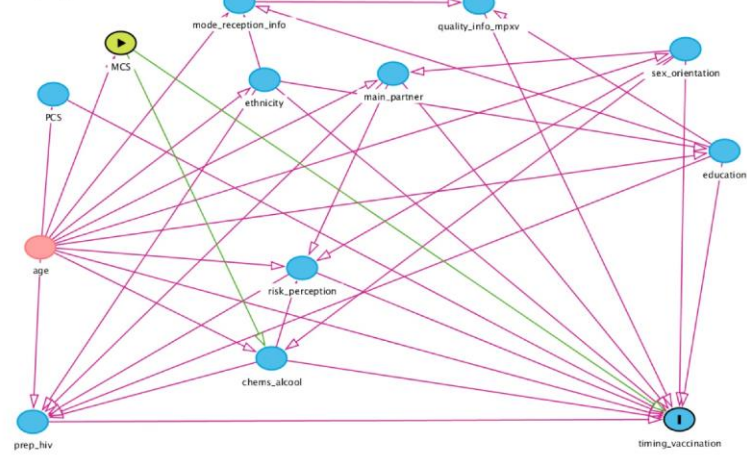

**(I) Mpox risk perception**

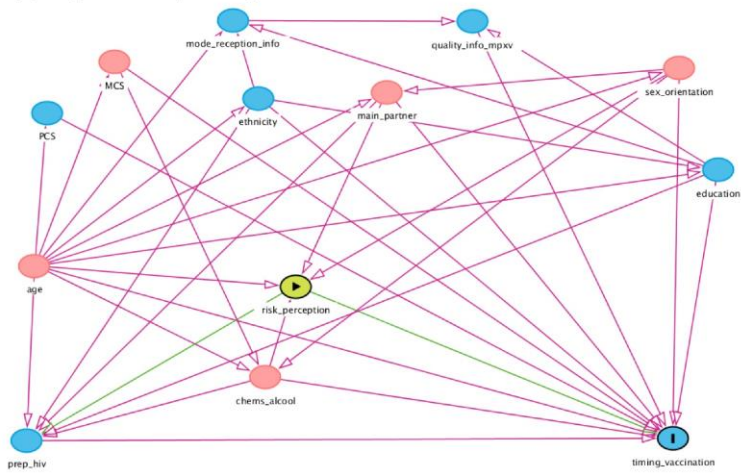

**(L) Quality on mpox vaccination information**

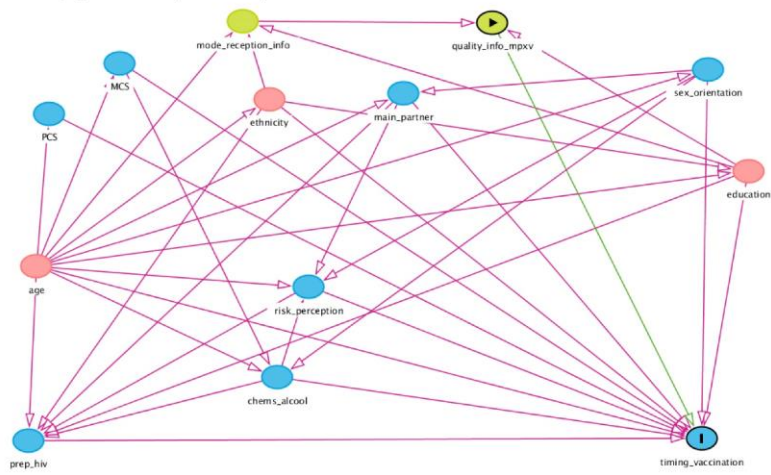

Supplement: Supplementary file 1 [file supplementary]
